# Supplementary material
Source: Elsevier journal article supplement (https://www.sciencedirect.com/science/article/pii/S0025775313002959)
Supplement: mmc1 [file S0025775313002959:mmc1.pdf]

**Anexo.** Cuestionario auto-referido utilizado para la recogida de datos.

SEISIDA (Sociedad Española Interdisciplinaria del SIDA) en colaboración con la Fundación Lluita contra la SIDA están llevando a cabo una investigación para conocer como es tu **calidad de vida y bienestar emocional**. Es por ello que pedimos tu colaboración.

A continuación te presentamos un cuestionario cuyas preguntas no tienen respuestas correctas ni incorrectas. Lo que nos interesa aquí es tu opinión, por lo tanto, te pedimos que seas sincero/a a la hora de responder al mismo. Procura responder a todas las preguntas que se te presentan. Este cuestionario es **anónimo y confidencial**, los resultados se utilizarán únicamente con fines de investigación y para tratar de conocer y mejorar la situación de las personas con VIH.

**SOBRE TI**

**Sexo:**

Hombre

☐

Mujer

☐

Transgénero

☐

**Raza:**

Caucásica/Europea

☐

Hispanica/Latinoamericana

☐

Asiática/Oriental

☐

Negra

☐

Otra/Desconocida

☐

**Edad:** \_\_\_\_\_

**País de residencia:**

España

☐

Otro: \_\_\_\_\_

**Nivel de estudios:**

Sin estudios

☐

Primarios (EGB, Graduado Escolar)

☐

Secundarios (FP II, BUP/COU, ESO, Bachiller)

☐

Superiores (Diplomatura, Licenciatura)

☐

Otros: \_\_\_\_\_

**Estado civil:**

Casado/a o en pareja

Divorciado/a o  
separado/a

Soltero/a

Viudo/a

|  |
|--|
|  |
|  |
|  |
|  |

**Orientación sexual:**

Heterosexual

Homosexual

Bisexual

Prefiero no contestar

|  |
|--|
|  |
|  |
|  |
|  |

**¿En qué año recibiste el diagnóstico de VIH?:** \_\_\_\_\_

**¿Conoces cuál fue tu vía de transmisión?**

Por relación sexual desprotegida

Por transfusión

Por compartir material de  
inyección

No lo sé

|  |
|--|
|  |
|  |
|  |
|  |

**¿Cuál es tu nivel actual de...**

a. CD4: \_\_\_\_\_

No lo sé: \_\_\_\_\_

b. Carga viral: \_\_\_\_\_

No lo sé: \_\_\_\_\_

**Eres miembro activo (voluntario/a, miembro de la junta directiva...) de alguna asociación que trabaja en el ámbito del VIH?**

Si

No

|  |
|--|
|  |
|  |

**¿Recibes atención (psicológica, grupos...) de alguna asociación que trabaja en el ámbito del VIH?**

Si

No

|  |
|--|
|  |
|  |

### **ESTADO COGNITIVO**

**Pensando en el último mes, marca con una X, la opción que mejor te defina:**

**¿Crees que has perdido memoria, capacidad para concentrarte, o para planificarte?**

SÍ

NO

|  |
|--|
|  |
|  |

**Sólo en el caso de que hayas apreciado cambios,**

**a) ¿Crees que han interferido en tu funcionamiento diario o en tu trabajo?**

SÍ

NO

|  |
|--|
|  |
|  |

**b) ¿En qué áreas lo has notado más? (puedes indicar más de una opción)**

- Concentración

- Capacidad para pensar

- Memoria

- Aprendizaje

- Planificación

- Lenguaje y comunicación

- Uso de las manos

- Otras:

|  |
|--|
|  |
|  |
|  |
|  |
|  |
|  |
|  |

\_\_\_\_\_

### **CALIDAD DE VIDA**

**Pensando en las dos últimas semanas, marca con una X la respuesta que consideres más adecuada en tu caso:**

**¿Cómo definirías tu salud física?**

Realmente mala

Más bien mala

Más bien buena

Realmente buena

|  |
|--|
|  |
|  |
|  |
|  |

**¿Cómo definirías tu salud psicológica o emocional?**

|                 |                          |
|-----------------|--------------------------|
| Realmente mala  | <input type="checkbox"/> |
| Más bien mala   | <input type="checkbox"/> |
| Más bien buena  | <input type="checkbox"/> |
| Realmente buena | <input type="checkbox"/> |

**¿Cómo definirías tu vida social?**

|                 |                          |
|-----------------|--------------------------|
| Realmente mala  | <input type="checkbox"/> |
| Más bien mala   | <input type="checkbox"/> |
| Más bien buena  | <input type="checkbox"/> |
| Realmente buena | <input type="checkbox"/> |

**¿Cómo definirías tu calidad de vida en general?**

|                 |                          |
|-----------------|--------------------------|
| Realmente mala  | <input type="checkbox"/> |
| Más bien mala   | <input type="checkbox"/> |
| Más bien buena  | <input type="checkbox"/> |
| Realmente buena | <input type="checkbox"/> |

**ESTADO EMOCIONAL**

**Para contestar a las siguientes preguntas, escoge una de las alternativas que se presentan a continuación. Por favor, marca con una cruz una sola casilla por pregunta.**

**¿Has sido capaz de concentrarte en lo que estás haciendo?**

|                            |                          |
|----------------------------|--------------------------|
| Mucho menos de lo habitual | <input type="checkbox"/> |
| Menos de lo habitual       | <input type="checkbox"/> |
| Igual que siempre          | <input type="checkbox"/> |
| Mejor que lo habitual      | <input type="checkbox"/> |

**¿Tus preocupaciones te han hecho perder mucho sueño?**

|                              |                          |
|------------------------------|--------------------------|
| Mucho mas de lo habitual     | <input type="checkbox"/> |
| Bastante más que lo habitual | <input type="checkbox"/> |
| No más que lo habitual       | <input type="checkbox"/> |
| No, en absoluto              | <input type="checkbox"/> |

**¿Has sentido que estás desempeñando un papel útil en la vida?**

|                                  |                          |
|----------------------------------|--------------------------|
| Mucho menos útil que lo habitual | <input type="checkbox"/> |
| Menos útil que lo habitual       | <input type="checkbox"/> |
| Igual que lo habitual            | <input type="checkbox"/> |
| Mas útil que lo habitual         | <input type="checkbox"/> |

**¿Te has sentido capaz de tomar decisiones sobre las cosas?**

|                                  |                          |
|----------------------------------|--------------------------|
| Mucho menos capaz de lo habitual | <input type="checkbox"/> |
| Menos que lo habitual            | <input type="checkbox"/> |
| Igual que lo habitual            | <input type="checkbox"/> |
| Mas que lo habitual              | <input type="checkbox"/> |

**¿Te has sentido constantemente en tensión?**

|                              |                          |
|------------------------------|--------------------------|
| Mucho más que lo habitual    | <input type="checkbox"/> |
| Bastante más que lo habitual | <input type="checkbox"/> |
| No más que lo habitual       | <input type="checkbox"/> |
| No, en absoluto              | <input type="checkbox"/> |

**¿Has tenido la sensación de que no podías superar tus dificultades?**

|                              |                          |
|------------------------------|--------------------------|
| Mucho más que lo habitual    | <input type="checkbox"/> |
| Bastante más que lo habitual | <input type="checkbox"/> |
| No más que lo habitual       | <input type="checkbox"/> |
| No, en absoluto              | <input type="checkbox"/> |

**¿Has sido capaz de disfrutar de tus actividades normales de cada día?**

|                                  |                          |
|----------------------------------|--------------------------|
| Mucho menos capaz de lo habitual | <input type="checkbox"/> |
| Menos que lo habitual            | <input type="checkbox"/> |
| Igual que lo habitual            | <input type="checkbox"/> |
| Más que lo habitual              | <input type="checkbox"/> |

**¿Has sido capaz de enfrentarte adecuadamente a tus problemas?**

|                                  |                          |
|----------------------------------|--------------------------|
| Mucho menos capaz de lo habitual | <input type="checkbox"/> |
| Menos que lo habitual            | <input type="checkbox"/> |
| Igual que lo habitual            | <input type="checkbox"/> |
| Más que lo habitual              | <input type="checkbox"/> |

**¿Te has sentido poco feliz y deprimido?**

|                              |                          |
|------------------------------|--------------------------|
| Mucho más que lo habitual    | <input type="checkbox"/> |
| Bastante más que lo habitual | <input type="checkbox"/> |
| No más que lo habitual       | <input type="checkbox"/> |
| No, en absoluto              | <input type="checkbox"/> |

**¿Has perdido confianza en ti mismo?**

|                              |                          |
|------------------------------|--------------------------|
| Mucho más que lo habitual    | <input type="checkbox"/> |
| Bastante más que lo habitual | <input type="checkbox"/> |
| No más que lo habitual       | <input type="checkbox"/> |
| No, en absoluto              | <input type="checkbox"/> |

**¿Has pensado que no vales para nada?**

|                              |                          |
|------------------------------|--------------------------|
| Mucho más que lo habitual    | <input type="checkbox"/> |
| Bastante más que lo habitual | <input type="checkbox"/> |
| No más que lo habitual       | <input type="checkbox"/> |
| No, en absoluto              | <input type="checkbox"/> |

**¿Te sientes razonablemente feliz considerando todas las circunstancias?**

|                              |                          |
|------------------------------|--------------------------|
| Mucho más que lo habitual    | <input type="checkbox"/> |
| Bastante más que lo habitual | <input type="checkbox"/> |
| No más que lo habitual       | <input type="checkbox"/> |
| No, en absoluto              | <input type="checkbox"/> |

### ADHERENCIA AL TRATAMIENTO ANTIRRETROVIRAL

- Nunca he tomado tratamiento antirretroviral: \_\_\_\_
- Alguna vez he tomado tratamiento antirretroviral pero no en estos momentos: \_\_\_\_
- Si en la actualidad estas tomando tratamiento, marca con una cruz, la casilla correspondiente a dicho tratamiento:

#### Inhibidores de la transcriptasa inversa análogos de nucleósido/nucleótido:

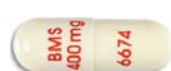

\_\_\_ Videx

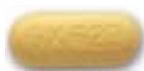

\_\_\_ Ziagen

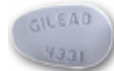

\_\_\_ Viread

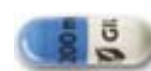

\_\_\_ Emtriva

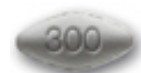

\_\_\_ Epivir

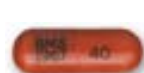

\_\_\_ Zerit

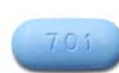

\_\_\_ Truvada

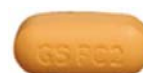

\_\_\_ Kivexa

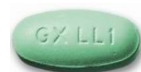

\_\_\_ Trizivir

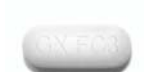

\_\_\_ Combivir

#### Inhibidores de la transcriptasa inversa análogos de nucleósido/nucleótido:

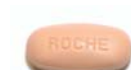

\_\_\_ Viramune

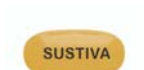

\_\_\_ Sustiva

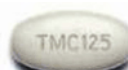

\_\_\_ Intelence

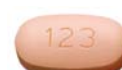

\_\_\_ Atripla

#### Inhibidores de la proteasa:

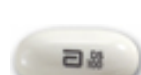

\_\_\_ Norvir

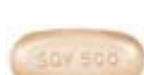

\_\_\_ Invirase

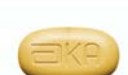

\_\_\_ Kaletra

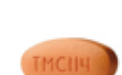

\_\_\_ Prezista

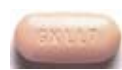

\_\_\_ Telzir

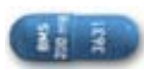

\_\_\_ Reyataz

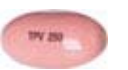

\_\_\_ Aptivus

Inhibidores de la fusión:

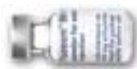

\_\_\_ Fuzeon

Inhibidores del receptor CCR5:

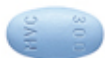

\_\_\_ Celsentri

Inhibidores de la integrasa:

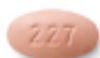

\_\_\_ Isentress

- ¿Cuántas pastillas en total debes tomar cada día para el tratamiento de tu infección por VIH? \_\_\_\_\_
- En la última semana, por los motivos que sea, ¿cuántas pastillas no te has podido tomar? \_\_\_\_\_
- En el último mes, por los motivos que sea, ¿cuántas pastillas no te has podido tomar? \_\_\_\_\_
- Si en algún momento no te has tomado el tratamiento, señala con una cruz la opción más adecuada:
  - He dejado de tomar todo el tratamiento: \_\_\_\_\_
  - He dejado de tomar algunos fármacos: \_\_\_\_\_. Indicar el nombre: \_\_\_\_\_
- ¿Cuál es el nivel de satisfacción con el tratamiento que estás tomando?

NINGUNO   0 ☐   1 ☐   2 ☐   3 ☐   4 ☐   5 ☐   6 ☐   7 ☐   8 ☐   9 ☐   10 ☐   TOTALMENTE
